# Supplementary material
Source: publisher site journal article supplement (https://www.spandidos-publications.com/3999/downloadSupplementary)
Supplement: Supplementary file 1 [file downloadSupplementary]

## Sheet: Sheet1
Table SIV. Gene Ontology term analysis of co-expression network genes in acute myocardial infarction.
goID	goClass	goTerm	-log10(pValue)	pValue	FDR	backgroundGeneNo	inputGeneList
GO:0031224	cellular_component	intrinsic component of membrane (72, 1.43)	3.25	0.000561069	0.0340892	5921	ZNF451,STEAP4,CLIC3,NCF4,MS4A7,AQP9,PRF1,DYSF,FASLG,SLC2A3,SLC4A4,FCAR,ADAMTS1,CA4,FLOT1,FLOT2,ENPP4,FFAR2,ENPP5,SLC12A9,CMKLR1,PTGDR,CR1,DGAT2,ACSL1,IL1R2,CMC1,KREMEN1,MCEMP1,TGFBR3,NPC1,B3GNT5,SLC7A5P1,KLRF1,MCTP2,TLR5,CHST2,DSC2,KLRB1,FPR1,TGFA,GPR84,ADGRG1,KLRK1,CXCR1,SLAMF7,NCAM1,SLC25A20,S1PR5,ST3GAL2,KLRG1,P2RY12,MGAM,KLRC4,MBOAT7,PTCH1,KCNJ15,TNFRSF10C,NKG7,MBOAT2,FAM209B,FAM209A,EXT1,VNN…
GO:0042581	cellular_component	specific granule (7, 5.15)	3.26	0.000543787	0.0340716	160	SLPI,ARG1,ANXA3,MCEMP1,SLC2A3,GPR84,FCAR
GO:0070821	cellular_component	tertiary granule membrane (6, 9.68)	4.26	5.46032e-05	0.00377515	73	MGAM,CYSTM1,MCEMP1,SLC2A3,GPR84,FCAR
GO:0101003	cellular_component	ficolin-1-rich granule membrane (7, 13.52)	5.78	1.67226e-06	0.000145777	61	MGAM,CR1,DOK3,FPR1,ENPP4,SLC2A3,FCAR
GO:0070062	cellular_component	extracellular exosome (41, 2.30)	6.33	4.73143e-07	6.32434e-05	2098	SPON2,STEAP4,CLIC3,RHOBTB3,DYSF,FAM129A,FASLG,SLC2A3,LIN7A,PYGL,N4BP2L2,PRSS23,SLC4A4,PGS1,ADGRG1,BASP1,PCBP2,MYO6,NAMPT,CA4,FLOT1,FLOT2,ENPP4,RPS11,SLC12A9,MGAM,CR1,GCA,ANXA3,H3F3A,AKR1C3,FAM209A,MMP9,TGFBR3,SLPI,NPC1,THRAP3,CYSTM1,S100A9,S100A8,DSC2
GO:0005886	cellular_component	plasma membrane (82, 1.68)	6.92	1.211e-07	2.69783e-05	5752	STEAP4,NCF4,AQP9,PRF1,DYSF,FASLG,SLC2A3,SLC4A4,FCAR,HK2,ETS2,BASP1,XPO6,NAMPT,CA4,GRB10,FLOT1,FLOT2,ENPP4,FFAR2,ENPP5,SLC12A9,CMKLR1,PTGDR,CR1,ACSL1,ANXA3,IL1R2,KREMEN1,IRAK3,MCEMP1,SYTL2,F5,TGFBR3,DOK3,NPC1,KLRF1,WDFY3,TLR5,S100A9,S100A8,DSC2,GAS7,KLRB1,FPR1,RHOBTB3,FAM129A,TGFA,LIN7A,GPR84,PGS1,C2orf88,ADGRG1,KLRK1,CXCR1,MYO6,S100A12,SLAMF7,NCAM1,S1PR5,GBP1,GBP4,KLRG1,P2RY12,MGAM,GCA,GZMA,PTCH1…
GO:0050786	molecular_function	RAGE receptor binding (4, 39.27)	5.09	8.16021e-06	0.0192499	12	FPR1,S100A12,S100A9,S100A8
GO:0140375	molecular_function	immune receptor activity (9, 7.80)	5.41	3.93254e-06	0.0185537	136	CR1,KLRK1,CXCR1,IL1R2,IL2RB,KLRF1,FPR1,FCAR,CMKLR1
GO:0019730	biological_process	antimicrobial humoral response (7, 5.81)	3.56	0.000273365	0.0488833	142	SPON2,SLPI,GNLY,S100A12,ADM,S100A9,S100A8
GO:0051712	biological_process	positive regulation of killing of cells of other organism (3, 29.45)	3.61	0.000247641	0.0458281	12	IFNG,ARG1,PRF1
GO:0070486	biological_process	leukocyte aggregation (3, 29.45)	3.61	0.000247641	0.0453013	12	IL1B,S100A9,S100A8
GO:0019915	biological_process	lipid storage (4, 14.73)	3.64	0.000231586	0.044406	32	DGAT2,IL1B,DYSF,FFAR2
GO:0019835	biological_process	cytolysis (4, 15.20)	3.68	0.000207208	0.0422785	31	GZMA,PRF1,GZMB,GZMH
GO:0046886	biological_process	positive regulation of hormone biosynthetic process (3, 32.13)	3.7	0.000199345	0.0412023	11	IFNG,IL1B,ADM
GO:0042742	biological_process	defense response to bacterium (11, 3.83)	3.72	0.000189265	0.040162	338	SPON2,KLRK1,SLPI,GNLY,ANXA3,S100A12,ADM,TLR5,S100A9,GBP4,S100A8
GO:0071398	biological_process	cellular response to fatty acid (5, 10.16)	3.72	0.000189099	0.0406691	58	DGAT2,PDK4,AKR1C3,FFAR2,PTGDR
GO:0090183	biological_process	regulation of kidney development (5, 10.52)	3.79	0.000162236	0.0358609	56	BASP1,STAT1,PDGFD,CFLAR,MMP9
GO:0032496	biological_process	response to lipopolysaccharide (11, 4.01)	3.89	0.000129156	0.0297902	323	SPON2,KLRK1,SLPI,ARG1,IL1B,FASLG,ADM,IRAK3,TLR5,FCAR,S100A8
GO:0002725	biological_process	negative regulation of T cell cytokine production (3, 39.27)	3.91	0.000121988	0.0289766	9	ARG1,TBX21,SMAD7
GO:0051240	biological_process	positive regulation of multicellular organismal process (31, 2.07)	3.93	0.000116894	0.0281875	1768	SPON2,ADM,N4BP2L2,HK2,KLRK1,BASP1,PDGFD,TBX21,GRB10,FLOT1,PROK2,ENPP4,FFAR2,CMKLR1,P2RY12,GBP5,ACSL1,STAT1,ANXA3,CMC1,IRAK3,CFLAR,MMP9,SYTL2,SMAD7,TGFBR3,VNN1,IFNG,IL1B,TLR5,S100A9
GO:0060334	biological_process	regulation of interferon-gamma-mediated signaling pathway (4, 18.12)	3.95	0.000112068	0.0278682	26	SOCS3,IFNG,ARG1,STAT1
GO:0019221	biological_process	cytokine-mediated signaling pathway (17, 2.89)	3.96	0.000110751	0.0279778	694	ACSL1,STAT1,IL1R2,FPR1,FASLG,IRAK3,MMP9,LMNB1,SOCS3,IFNG,CXCR1,IL1B,IL2RB,BOLA2,NCAM1,GBP1,CMKLR1
GO:0071346	biological_process	cellular response to interferon-gamma (8, 5.75)	3.97	0.000107316	0.0275473	164	GBP5,IFNG,STAT1,FASLG,NCAM1,GBP1,FCAR,GBP4
GO:0002228	biological_process	natural killer cell mediated immunity (4, 18.85)	4.01	9.77653e-05	0.0259322	25	KLRK1,GZMB,SLAMF7,KLRD1
GO:0009892	biological_process	negative regulation of metabolic process (45, 1.79)	4.07	8.44022e-05	0.0231597	2960	CDKN1C,ZNF451,SMG1,DYSF,FAM129A,FASLG,N4BP2L2,PHF21A,HK2,ETS2,SOCS3,ZNF608,NFIL3,BASP1,TBX21,NAMPT,PDK4,GRB10,FLOT2,RPL38,RPS11,GBP1,EXOSC1,KLF11,CR1,DGAT2,STAT1,GZMA,IL1R2,PTCH1,H3F3A,CMC1,AKR1C3,GZMB,IRAK3,CFLAR,MMP9,SYTL2,SMAD7,IFNG,SLPI,NPC1,THRAP3,IL1B,RPS24
GO:0051092	biological_process	positive regulation of NF-kappaB transcription factor activity (8, 6.04)	4.11	7.69701e-05	0.0218746	156	IL1B,FLOT1,S100A12,FLOT2,IRAK3,CFLAR,S100A9,S100A8
GO:0050832	biological_process	defense response to fungus (5, 12.80)	4.16	6.8557e-05	0.0198379	46	SPON2,GNLY,S100A12,S100A9,S100A8
GO:0044262	biological_process	cellular carbohydrate metabolic process (10, 6.85)	5.47	3.39906e-06	0.001288	172	GK5,EXT1,MGAM,DGAT2,PFKFB3,PPP1R3B,B3GNT5,DYSF,PYGL,HK2
GO:0006954	biological_process	inflammatory response (17, 3.97)	5.67	2.14009e-06	0.00085149	505	GBP5,FPR1,ADM,VNN1,IFNG,IL1B,NAMPT,PROK2,S100A12,FFAR2,TLR5,S100A9,CHST2,S100A8,KLRG1,CMKLR1,PTGDR
GO:0043312	biological_process	neutrophil degranulation (23, 5.62)	10.31	4.90021e-11	1.1141e-07	482	MGAM,CR1,GCA,ARG1,ANXA3,FPR1,MCEMP1,SLC2A3,GPR84,PYGL,MMP9,FCAR,VNN1,FCGR2A,DOK3,CXCR1,SLPI,S100A12,ENPP4,CYSTM1,PLEKHO2,S100A9,S100A8
